# Supplementary material for: Predicting tumor repopulation through the gene panel derived from radiation resistant colorectal cancer cells
Source: Springer Nature journal article supplement (doi:10.1186/s12967-023-04260-x), 2023-06-16
Supplement: MOESM1 [file 25502518]

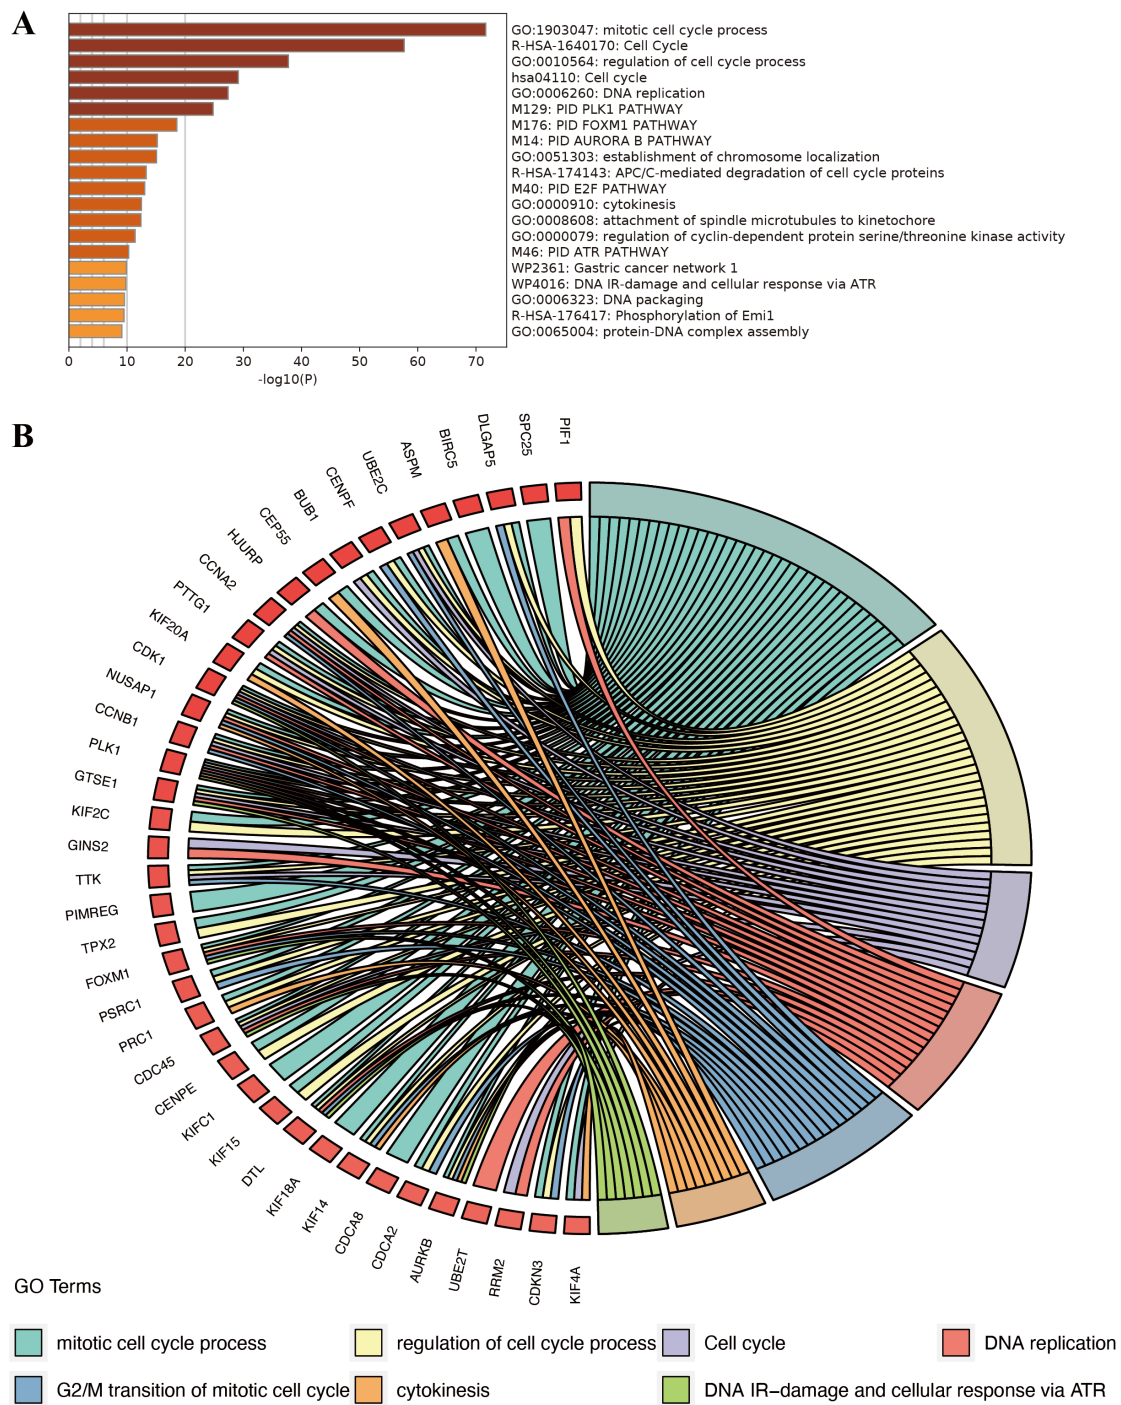

**Supplementary Figure 1.** GO analysis **(A)** and chord diagrams **(B)** of 252 co-upregulated genes.
