# Supplementary material for: Predicting tumor repopulation through the gene panel derived from radiation resistant colorectal cancer cells
Source: Springer Nature journal article supplement (doi:10.1186/s12967-023-04260-x), 2023-06-16
Supplement: MOESM2 [file 25502518]

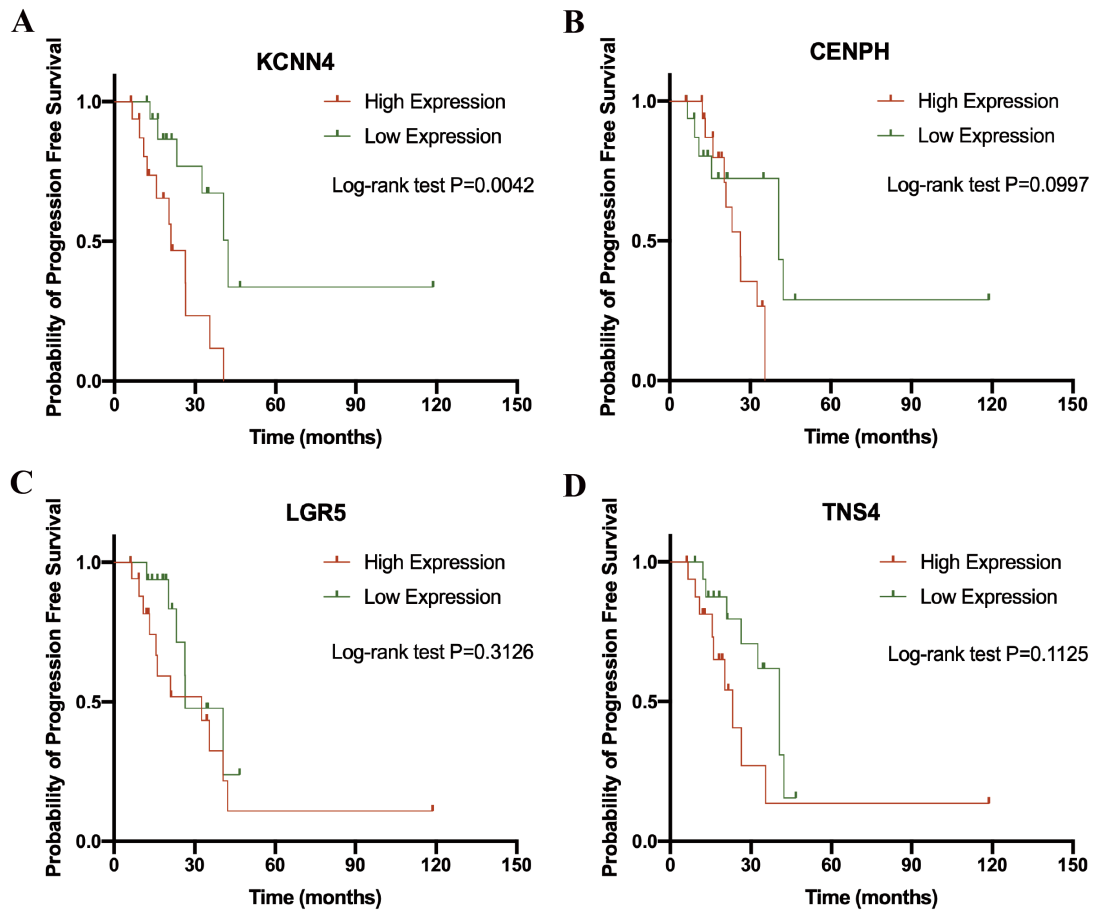

**Supplementary Figure 2.** Survival curves of each single gene. Patients were grouped by median mRNA expression of each gene.
