# Supplementary material for: Predicting tumor repopulation through the gene panel derived from radiation resistant colorectal cancer cells
Source: Springer Nature journal article supplement (doi:10.1186/s12967-023-04260-x), 2023-06-16
Supplement: MOESM3 [file 25502518]

| A | Characteristics      | Hazard.Ratio | CI95        | P. Value |
|---|----------------------|--------------|-------------|----------|
|   | Age                  | 1.01         | 0.94-1.07   | 0.861    |
|   | Stage (I/II/III/IV)  | 0.34         | 0.03-4.01   | 0.393    |
|   | Gender (Male/Female) | 2.02         | 0.49-8.34   | 0.329    |
|   | T Stage (1/2/3/4)    | 2.66         | 0.19-37.75  | 0.471    |
|   | N Stage (0/1/2)      | 2.45         | 0.59-10.19  | 0.218    |
|   | M Stage (0/1)        | 5.92         | 0.26-136.14 | 0.266    |
|   | Chemotherapy         | 0.63         | 0.14-2.80   | 0.541    |
|   | Riskscore            | 2.82         | 1.57-5.06   | 0.001    |

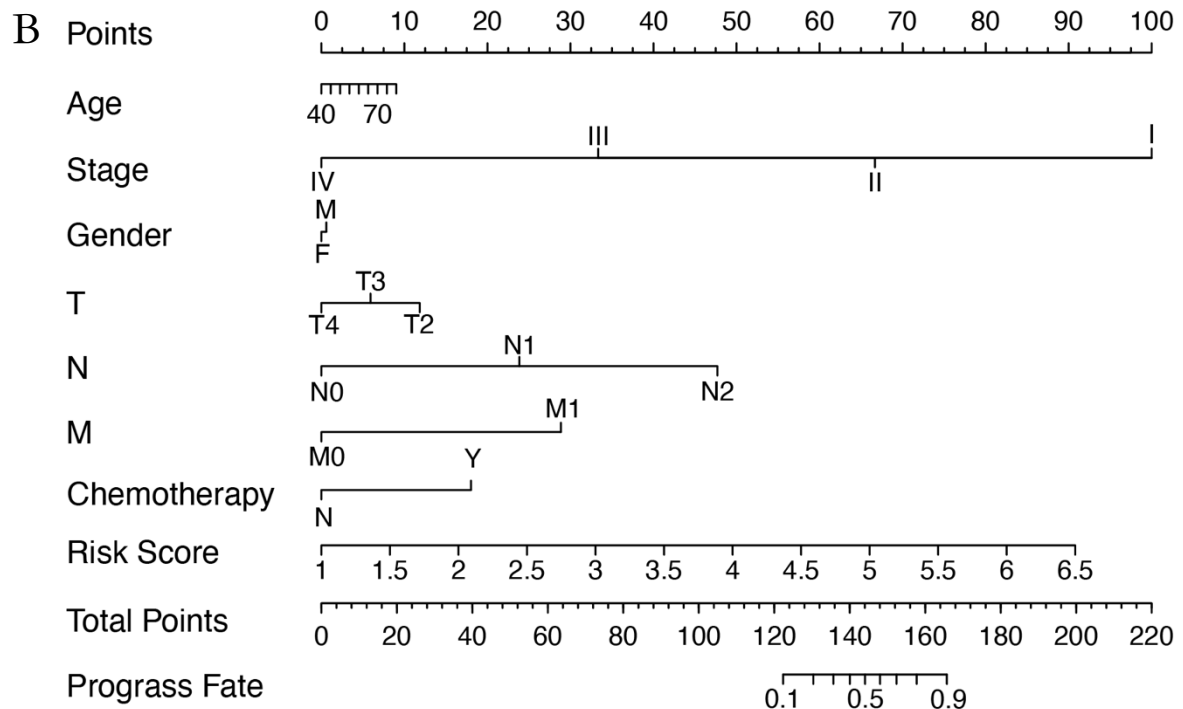

**Supplementary Figure 3.** Multivariate regression analysis combined with clinical information (A), and a nomogram reflecting the ability to predict progress (B).
