# Supplementary material for: Predicting tumor repopulation through the gene panel derived from radiation resistant colorectal cancer cells
Source: Springer Nature journal article supplement (doi:10.1186/s12967-023-04260-x), 2023-06-16
Supplement: MOESM4 [file 25502518]

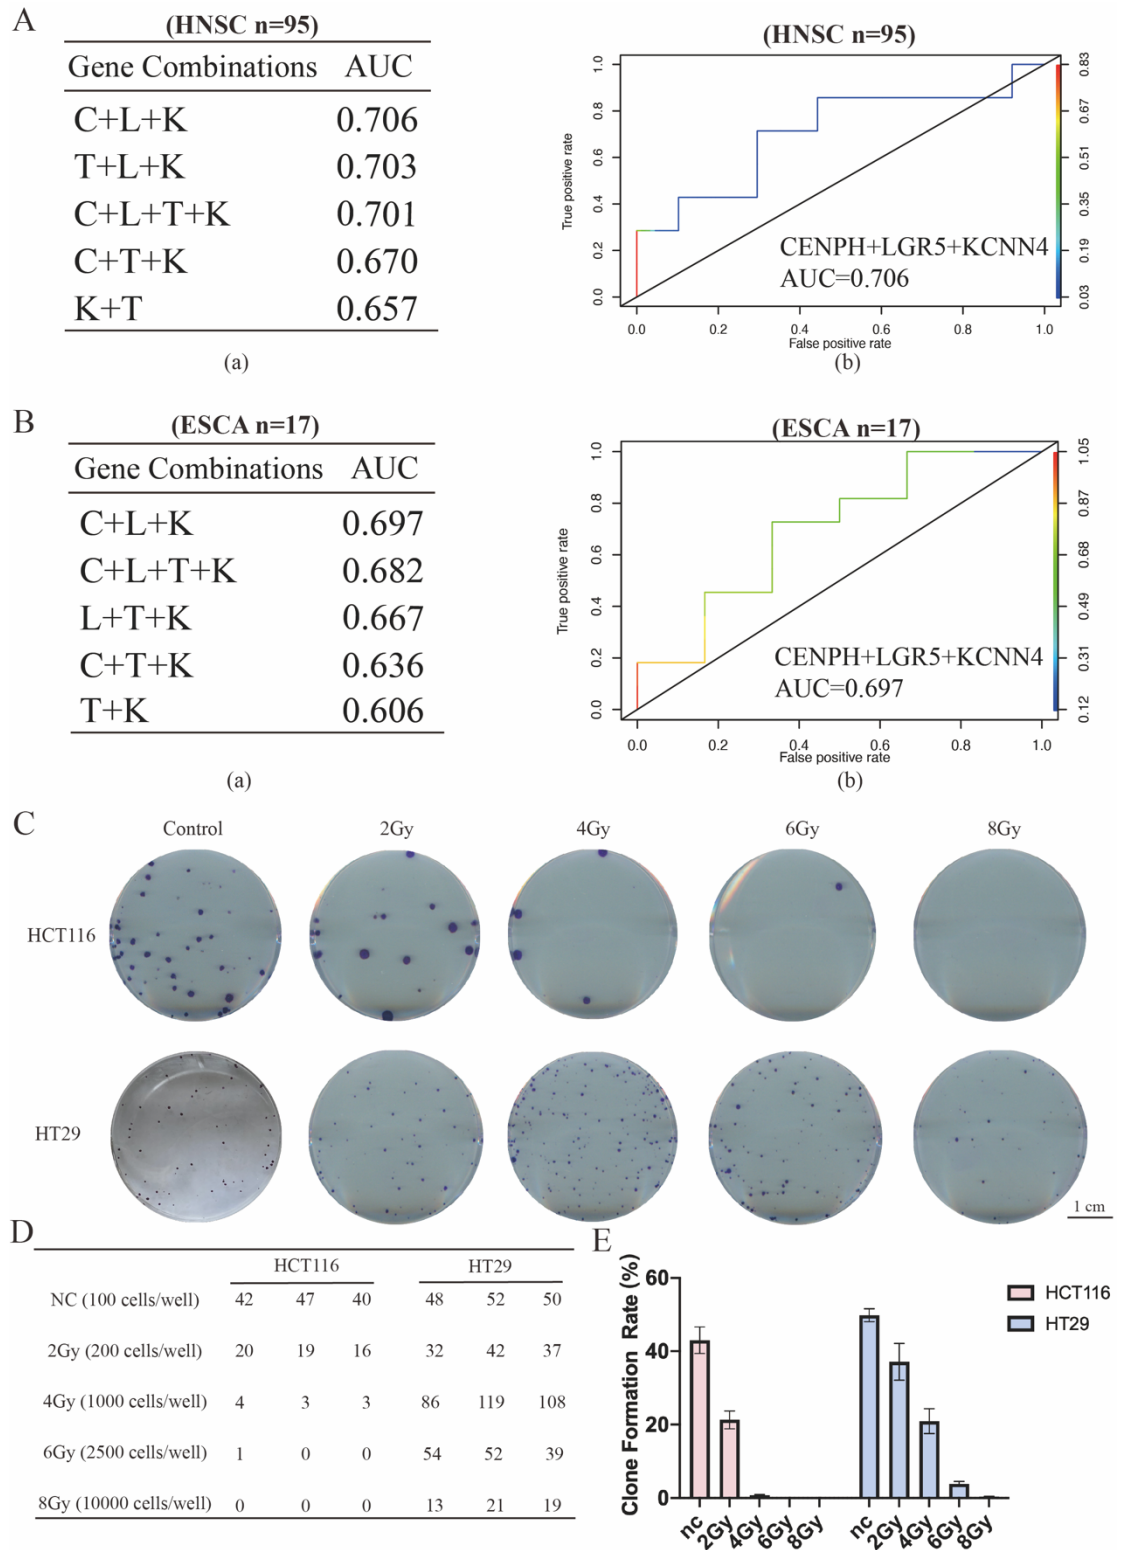

**Supplementary Figure 4.** Representative evidence of further validation in TCGA and clonogenic formation assay. (A) (B) The top five candidate gene combinations with AUC values in TCGA head and neck cancer (n=95) and esophageal cancer (n=17), and ROC curve of the best prognostic model. (C) Using HCT116 and HT29 cells treated by various radiation dose. (D) Statistics of the number of clones formed. The experiment was repeated three times for each dose. (E) Clone formation rate of the two cells.
