# Supplementary material for: Predicting tumor repopulation through the gene panel derived from radiation resistant colorectal cancer cells
Source: Springer Nature journal article supplement (doi:10.1186/s12967-023-04260-x), 2023-06-16
Supplement: MOESM5 [file 25502518]

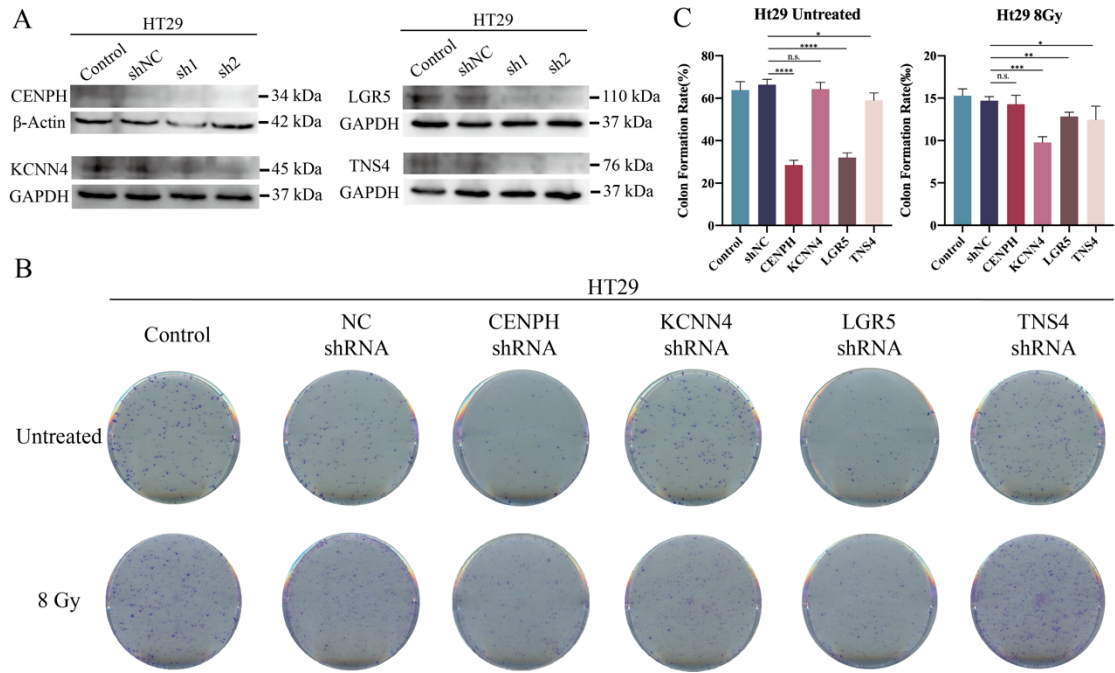

**Supplementary Figure 5.** Radio-sensitivity of gene knockdown Ht29 cell lines. (A) Verification of gene expression in knockdown cells by Western Blot experiments. (B) Clone formation assay results of 8Gy radiation group and untreated group. (C) Analysis of clone formation assay.
